# Supplementary material for: Resensitizing carbapenem- and colistin-resistant bacteria to antibiotics using auranofin
Source: PubMed Central journal article supplement (PMC7568570; doi:10.1038/s41467-020-18939-y), 2020-10-16
Supplement: 41467_2020_18939_MOESM1_ESM.pdf [file 41467_2020_18939_MOESM1_ESM.pdf]

## Supplementary Information

### **Resensitizing carbapenem- and colistin-resistant bacteria to antibiotics using auranofin**

Hongzhe Sun<sup>1†\*</sup>, Qi Zhang<sup>1†</sup>, Runming Wang<sup>1†\*</sup>, Haibo Wang<sup>1</sup>, Yuen-Ting Wong<sup>1,2</sup>, Minji Wang<sup>3</sup>, Quan Hao<sup>4</sup>, Aixin Yan<sup>3</sup>, Richard Yi-Tsun Kao<sup>2,5,6</sup>, Pak-Leung Ho<sup>2,5,6</sup>, and Hongyan Li<sup>1</sup>

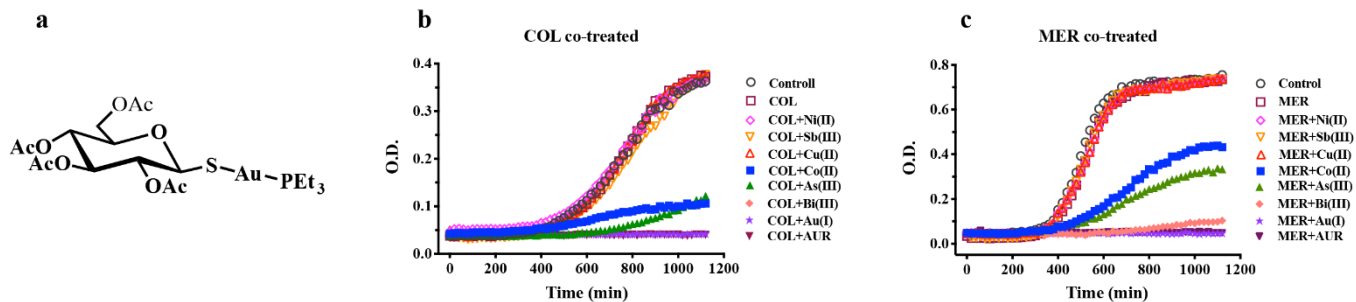

**Supplementary Fig. 1** | **a**, Structure of AUR. **b,c**, Bacterial growth curves show the antimicrobial effect of **(b)** COL and **(c)** MER against *E. coli* CKE (MCR-1<sup>+</sup>, NDM-5<sup>+</sup>) in the presence of different metal compounds. The concentrations of all metal ions were fixed at 50  $\mu\text{g}\cdot\text{mL}^{-1}$  while COL (1  $\mu\text{g}\cdot\text{mL}^{-1}$ ) and MER (2  $\mu\text{g}\cdot\text{mL}^{-1}$ ) were used at sub-inhibitory concentration.

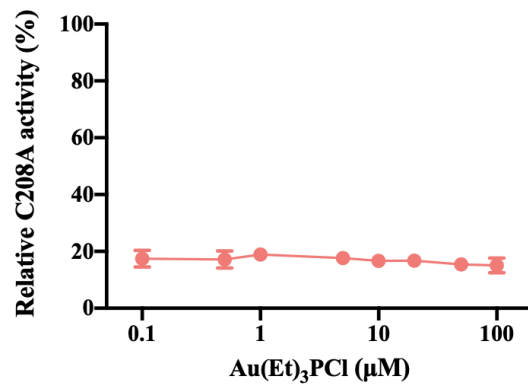

**Supplementary Fig. 2** | Inhibition of NDM-1-C208A by Au(PEt<sub>3</sub>)Cl. Note the low activity of the enzyme and limited inhibition by Au(PEt<sub>3</sub>)Cl. Mean values of three replicates are shown and error bars indicate  $\pm$ SEM, n=3 biologically independent samples. Source data are provided with this paper.

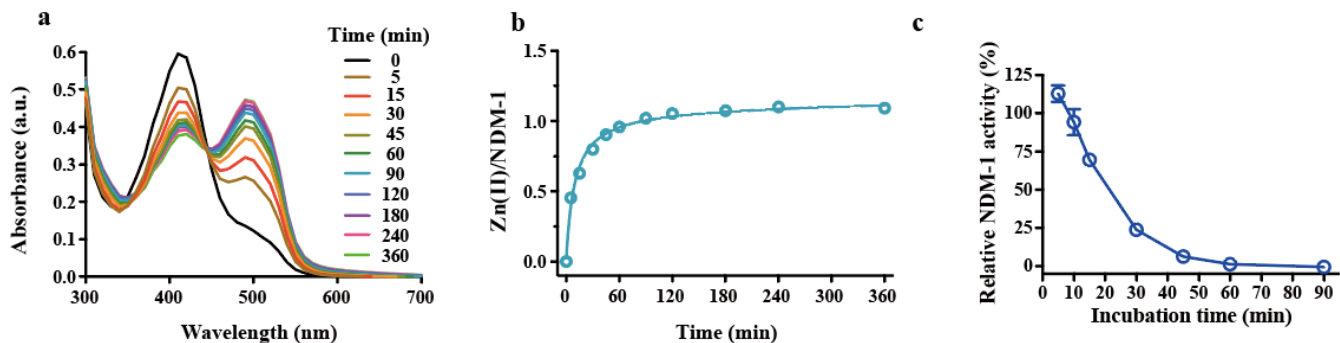

**Supplementary Fig. 3 | a**, UV-vis spectra of Zn<sub>2</sub>-NDM-1 in the presence of Au(PEt<sub>3</sub>)Cl as well as PAR reagent at different time points. **b**, Kinetics of Zn(II) released from Zn<sub>2</sub>-NDM-1 ( $t_{1/2} = 13.78$  min) at different time points. Zn<sub>2</sub>-NDM-1 (10  $\mu$ M) supplemented with 150  $\mu$ M PAR was titrated with 200  $\mu$ M Au(PEt<sub>3</sub>)Cl at 25  $^{\circ}$ C and UV spectra was recorded at various time intervals after the addition of Au(PEt<sub>3</sub>)Cl. The concentration of released Zn(II) was determined by comparing the absorbance at 490 nm to a Zn(II) standard curve. **c**, Inhibition of activity of NDM-1 that was preincubated with Au(PEt<sub>3</sub>)Cl (5  $\mu$ M) for different time. Data are presented as mean values  $\pm$ SEM, n=3 biologically independent samples. Source data are provided with this paper.

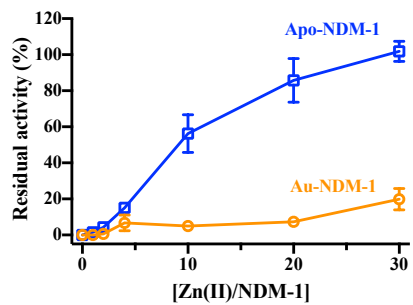

**Supplementary Fig. 4** | Restoration of the activity of NDM-1 upon supplementation of various ratios of Zn(II) to apo-NDM-1 and Au-NDM-1, respectively. Mean values of three replicates are shown and error bars indicate  $\pm$ SEM, n=3 biologically independent samples. Source data are provided with this paper.

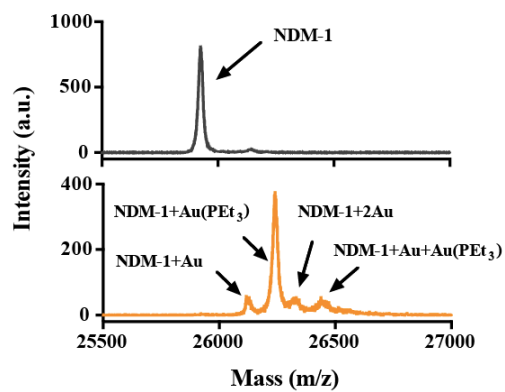

**Supplementary Fig. 5** | MALDI-TOF-MS of NDM-1 after incubation with 10 molar equivalence of AUR. The peak at  $m/z$  of 25925.4 corresponds to NDM-1 monomer. The peaks at  $m/z$  of 26124.3, 26240.7, 26323.1 and 26442.9 were assigned to [NDM-1+Au] (calcd: 26122.4), [NDM-1+Au(PEt<sub>3</sub>)] (calcd: 26240.5), [NDM-1+2Au] (calcd: 26319.3), and [NDM-1+Au+Au(PEt<sub>3</sub>)] (calcd: 26437.5), respectively.

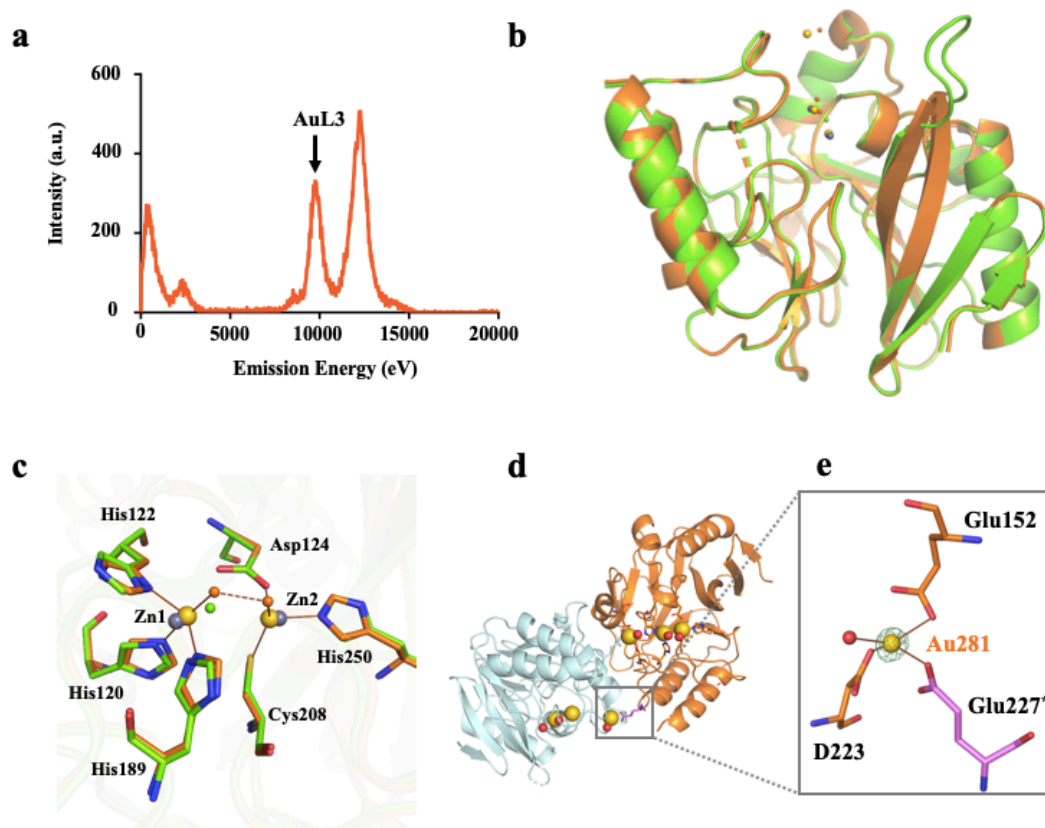

**Supplementary Fig. 6** | **a**, X-ray excitation scans at 0.998 Å for Au-NDM-1 crystal. Gold exhibits emission at 9.8 keV, corresponding to its L3 absorption edge. The emission at around 13 keV is from the background. **b,c**, Superimposition of **(b)** overall structures and **(c)** active site of Au-NDM-1 (PDB ID: 6LHE) (orange) with native Zn-NDM-1(PDB ID: 5ZGE) (green). Au(I) ions are shown as yellow spheres and Zn(II) ions as grey spheres. Structural alignment was done over  $C_{\alpha}$  residues using DaliLite and the images were generated using PyMOL. The two structures can be superimposed well with a RMSD value of 0.211 Å. **d**, overall structure of Au-NDM-1. **e**, Binding of Au<sup>281</sup> to a non-active site of Au-NDM-1. Note that Au<sup>281</sup> coordinates Asp223, Glu152 as well as a Glu227\* from an adjacent symmetric unit.

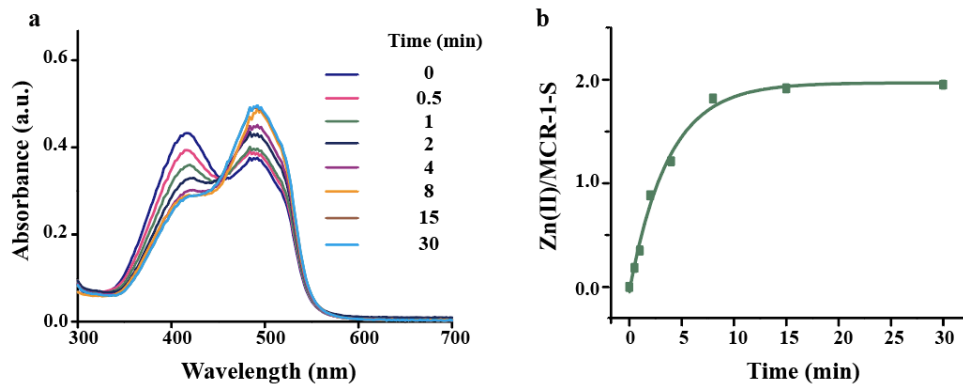

**Supplementary Fig. 7 | a**, UV-vis spectra of MCR-1-S in the presence of Au(PEt<sub>3</sub>)Cl and PAR at different times. **b**, Kinetics of Zn(II) release from Zn<sub>3</sub>-MCR-1-S ( $t_{1/2}$ = 2.54 min). Zn<sub>3</sub>-MCR-1-S (20  $\mu$ M) supplemented with 150  $\mu$ M PAR was titrated with Au(PEt<sub>3</sub>)Cl (200  $\mu$ M) at 25 °C. The UV spectra was recorded at various time points after the addition of Au(PEt<sub>3</sub>)Cl. The concentration of metal released was determined by comparing the absorbance at 490 nm to a Zn(II) standard curve.



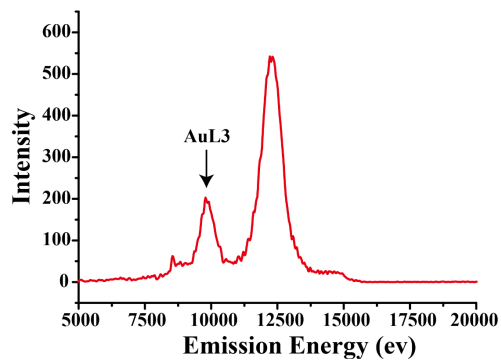

**Supplementary Fig. 8** | X-ray excitation scans at 0.998 Å for Au-MCR-1-S crystal. Emission at 9.8 keV was observed, corresponding to L3 absorption edge of gold. The emission at around 13 keV is from the background.

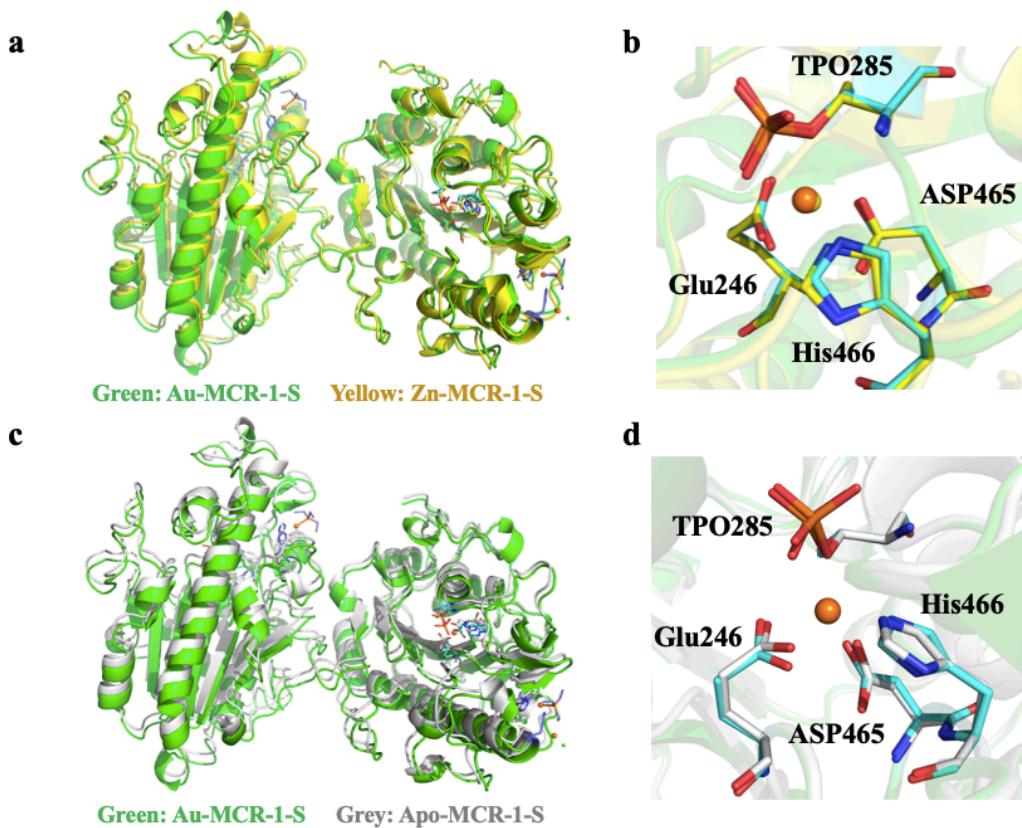

**Supplementary Fig. 9** | **a,b**, Superimposition of **(a)** overall structures and **(b)** active sites of Au-MCR-1-S (PDB ID: 6LI6) (green) with native Zn-MCR-1-S (PDB ID: 6LI4) (orange) (RMSD value of 0.476 Å). **c,d**, Superimposition of **(c)** overall structures and **(d)** active sites of Au-MCR-1-S (green) with apo-MCR-1-S (PDB ID: 6LI5) (grey) (RMSD value of 0.573 Å). Au(I) ions are shown as orange spheres. Structural alignment was done over C<sub>α</sub> residues using DaliLite and the images were generated using PyMOL.

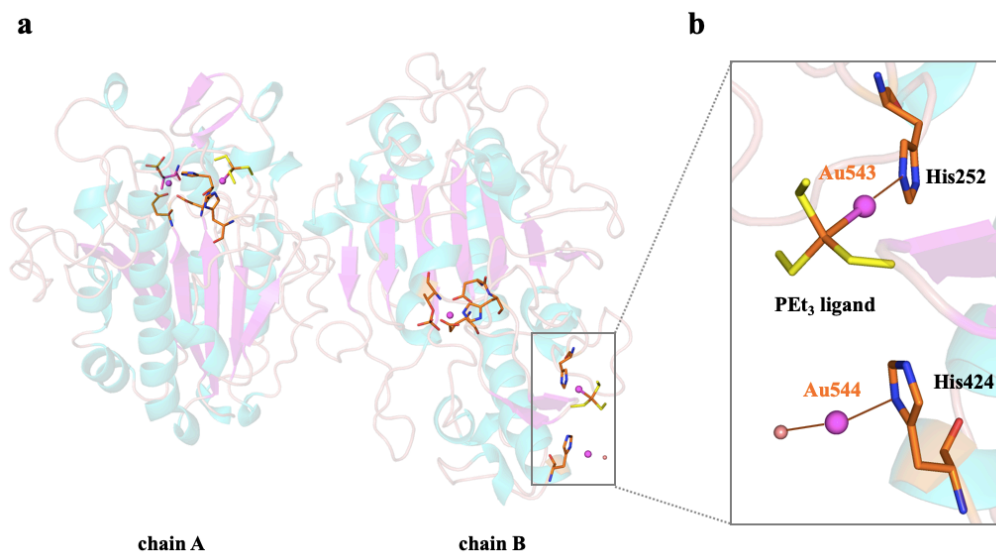

**Supplementary Fig. 10 | a**, Overall structure of Au-MCR-1-S. **b**, Binding of Au(I) ions (Au<sup>543</sup> and Au<sup>544</sup>) to the non-active sites in Au-MCR-1-S structure. Note that Au<sup>543</sup> was only observed in chain B in the asymmetric unit of Au-MCR-1-S.

**Supplementary Table 1** | Collection of X-ray crystallography data and refinement statistics for Au-NDM-1.

| <b>Data collection</b>            | <b>Au-NDM-1</b>                                       |
|-----------------------------------|-------------------------------------------------------|
| Wavelength (Å)                    | 1.04005                                               |
| Resolution range (Å)              | 36.88 - 1.21 (1.25 - 1.21)*                           |
| Space group                       | <i>P</i> 2 <sub>1</sub> 2 <sub>1</sub> 2 <sub>1</sub> |
| a, b, c (Å)                       | 70.47, 73.76, 77.72                                   |
| $\alpha$ , $\beta$ , $\gamma$ (°) | 90.00, 90.00, 90.00                                   |
| Unique reflections                | 124364 (12191)                                        |
| Completeness (%)                  | 99.50 (98.56)                                         |
| Mean I/sigma(I)                   | 23.55 (3.52)                                          |
| Wilson B-factor                   | 15.49                                                 |
| R <sub>merge</sub>                | 0.0265 (0.236)                                        |
| R <sub>means</sub>                | 0.0375 (0.334)                                        |
| Reflections for refinement        | 124343 (12189)                                        |
| R <sub>work</sub>                 | 0.173 (0.265)                                         |
| R <sub>free</sub>                 | 0.187 (0.274)                                         |
| Number of non-hydrogen atoms      | 3766                                                  |
| RMS (bonds) (Å)                   | 0.005                                                 |
| RMS (angles) (°)                  | 1.18                                                  |
| Ramachandran favoured (%)         | 99.09                                                 |
| Ramachandran allowed (%)          | 0.91                                                  |
| Ramachandran outliers (%)         | 0.00                                                  |

\*Statistics for the highest-resolution shell are shown in parentheses.

**Supplementary Table 2** | Bond length (Å) of Au(I) to coordinated ligands in Au-NDM-1.

| <b>Metal-ligand<br/>Distances (Å)</b> | <b>Au-NDM-1*</b> |       |       |
|---------------------------------------|------------------|-------|-------|
|                                       | Au281            | Au282 | Au283 |
| Glu152-Oε2                            | 2.3              |       |       |
| Asp223-Oε2                            | 2.2              |       |       |
| Glu227-Oε2                            | 2.4              |       |       |
| HOH391-O                              | 2.2              |       |       |
| Cys208-Sγ                             |                  | 2.5   |       |
| His250-Nε2                            |                  | 2.3   |       |
| Asp124-O                              |                  | 2.2   |       |
| HOH291-O                              |                  | 2.4   |       |
| His122-Nδ1                            |                  |       | 2.0   |
| His120-Nε2                            |                  |       | 2.5   |
| His189-Nε2                            |                  |       | 2.0   |
| HOH410-O                              |                  |       | 1.9   |

\*Values in parentheses are for the highest resolution shell.

**Supplementary Table 3 |** Susceptibility of MBL-positive or -negative strains against MER and AUR combination.

| Strain                                     | MER MIC ( $\mu\text{g}\cdot\text{mL}^{-1}$ ) in the presence of AUR at concentration stated<br>( $\mu\text{g}\cdot\text{mL}^{-1}$ ) |      |       |        | FIC index* |
|--------------------------------------------|-------------------------------------------------------------------------------------------------------------------------------------|------|-------|--------|------------|
|                                            | 0                                                                                                                                   | 2    | 4     | 16     |            |
| <i>E. coli</i> BL21                        | 0.03                                                                                                                                | 0.03 | 0.015 | 0.015  | 0.625      |
| NDM-HK                                     | 16                                                                                                                                  | 8    | 4     | 0.25   | 0.156      |
| <i>E. coli</i> CKE                         | 32                                                                                                                                  | 32   | 16    | 2      | 0.313      |
| <i>K. pneumoniae</i> (NDM-1 <sup>+</sup> ) | 64                                                                                                                                  | 32   | 8     | 2      | 0.156      |
| <i>E. coli</i> (VIM-2 <sup>+</sup> )       | 4                                                                                                                                   | 0.5  | 0.25  | 0.125  | 0.140      |
| <i>E. coli</i> (IMP-4 <sup>+</sup> )       | 8                                                                                                                                   | 2    | 1     | 0.0625 | 0.133      |
| <i>E. coli</i> (CphA <sup>+</sup> )        | 4                                                                                                                                   | 1    | 1     | 0.5    | 0.375      |

\*AUR was ineffective towards all the tested strains.  $\text{MIC}_{\text{AUR}} = 64 \mu\text{g}\cdot\text{mL}^{-1}$  was used for the calculation of FICI.

**Supplementary Table 4** | Data collection and refinement statistics for apo-MCR-1-S, Au-MCR-1-S and Zn-MCR-1-S.

| Data collection                        | Apo-MCR-1-S            | Zn-MCR-1-S             | Au-MCR-1-S             |
|----------------------------------------|------------------------|------------------------|------------------------|
| Space group                            | P1 21 1                | P1 21 1                | P1 21 1                |
| a, b, c (Å)                            | 47.16, 84.05, 81.42    | 46.97, 84.20, 81.40    | 47.02, 84.49, 81.93    |
| $\alpha, \beta, \gamma$ (°)            | 90.00, 98.51, 90.00    | 90.00, 98.78, 90.00    | 90.00, 98.64, 90.00    |
| Wavelength (Å)                         | 0.97915                | 0.97915                | 0.97915                |
| Resolution (Å)                         | 30.71~1.82(1.86~1.82)* | 32.99~1.83(1.90~1.83)* | 43.22~1.60(1.66~1.60)* |
| Multiplicity                           | 2.0 (2.0)              | 2.0 (2.0)              | 2.0 (2.0)              |
| Completeness (%)                       | 96.73                  | 98.87                  | 99.83                  |
| Wilson B-factor                        | 39.24                  | 26.30                  | 25.27                  |
| Reflections used in R <sub>free</sub>  | 2482(263)              | 2570(278)              | 4252(392)              |
| R <sub>work</sub> /R <sub>free</sub>   | 0.202/0.241            | 0.188/0.226            | 0.2635/0.2794          |
| Macromolecular                         | 5122                   | 5027                   | 5080                   |
| Protein residues                       | 646                    | 646                    | 646                    |
| RMSD (bonds) (Å)                       | 0.007                  | 0.005                  | 0.007                  |
| RMSD (angles) (°)                      | 0.87                   | 1.04                   | 0.88                   |
| Ramachandran favoured (%)              | 96.54                  | 97.51                  | 97.01                  |
| Ramachandran allowed (%)               | 3.14                   | 2.18                   | 2.67                   |
| Ramachandran outliers (%)              | 0.31                   | 0.31                   | 0.31                   |
| Average B, all atoms (Å <sup>2</sup> ) | 50.56                  | 39.45                  | 36.70                  |
| Water                                  | 75                     | 329                    | 176                    |

\*Values in parentheses are for the highest resolution shell.

**Supplementary Table 5** Bond length (Å) of Zn(II) and Au(I) to coordinated in Zn-MCR-1-S and Au-MCR-1-S.

| Metal-ligand Distances (Å) | Zn-MCR-1-S* |       | Au-MCR-1-S* |                    |
|----------------------------|-------------|-------|-------------|--------------------|
|                            | Zn542       | Au542 | Au543       | Au544 <sup>#</sup> |
| Thr285-O $\gamma$          | 2.0         | 2.2   |             |                    |
| His466-N $\epsilon$ 2      | 2.1         | 2.2   |             |                    |
| Asp465-O $\delta$ 1        | 2.0         | 2.2   |             |                    |
| Glu246-O $\epsilon$ 1      | 2.0         | 2.3   |             |                    |
| His255-N $\epsilon$ 2      |             |       | 2.2         |                    |
| PE <sub>3</sub> -P1        |             |       | 2.5         |                    |
| His424-N $\delta$ 1        |             |       |             | 2.2                |
| HOH549-O                   |             |       |             | 2.2                |

\*Values in parentheses are for the highest resolution shell.

<sup>#</sup>Au544 was only seen in one chain in an asymmetric unit as shown in **Supplementary Fig. 10**.



**Supplementary Table 6 |** Susceptibility of MCR-positive or -negative strains against COL and AUR combination.

| Strain                                         | COL MIC ( $\mu\text{g}\cdot\text{mL}^{-1}$ ) in the presence of AUR at concentration stated<br>( $\mu\text{g}\cdot\text{mL}^{-1}$ ) |       |      |       | FIC index* |
|------------------------------------------------|-------------------------------------------------------------------------------------------------------------------------------------|-------|------|-------|------------|
|                                                | 0                                                                                                                                   | 0.625 | 1.25 | 5     |            |
| <i>E. coli</i> J53<br>(vector control)         | 0.5                                                                                                                                 | 0.25  | 0.25 | 0.25  | 0.531      |
| MCR-1-J53                                      | 8                                                                                                                                   | 0.5   | 0.5  | 0.125 | 0.094      |
| <i>E. coli</i> CKE                             | 8                                                                                                                                   | 4     | 2    | 1     | 0.281      |
| <i>S. flexneri</i> (MCR-1 <sup>+</sup> )       | 4                                                                                                                                   | 1     | 1    | 0.5   | 0.281      |
| <i>S. typhimurium</i><br>(MCR-1 <sup>+</sup> ) | 16                                                                                                                                  | 2     | 1    | 0.25  | 0.125      |
| <i>K. pneumoniae</i><br>(MCR-1 <sup>+</sup> )  | 64                                                                                                                                  | 16    | 8    | 2     | 0.125      |
| <i>E. asburiae</i> (MCR-1 <sup>+</sup> )       | 8                                                                                                                                   | 1     | 0.5  | 0.125 | 0.125      |
| <i>E. aerogenes</i><br>(MCR-1 <sup>+</sup> )   | 8                                                                                                                                   | 4     | 1    | 0.125 | 0.187      |
| <i>E. kobei</i> (MCR-1 <sup>+</sup> )          | 8                                                                                                                                   | 0.5   | 0.25 | 0.125 | 0.094      |
| MCR-1.5-J53                                    | 8                                                                                                                                   | 0.5   | 0.5  | 0.25  | 0.094      |
| MCR-1.6-J53                                    | 8                                                                                                                                   | 0.5   | 0.5  | 0.25  | 0.094      |
| MCR-1.7-J53                                    | 8                                                                                                                                   | 0.5   | 0.5  | 0.25  | 0.094      |
| MCR-1.9-J53                                    | 8                                                                                                                                   | 0.5   | 0.5  | 0.25  | 0.094      |
| MCR-1.10-J53                                   | 8                                                                                                                                   | 0.5   | 0.5  | 0.25  | 0.094      |
| MCR-2.1-J53                                    | 8                                                                                                                                   | 0.5   | 0.5  | 0.25  | 0.094      |
| MCR-3.1-J53                                    | 8                                                                                                                                   | 1     | 1    | 0.125 | 0.156      |
| MCR-4.1-J53                                    | 8                                                                                                                                   | 1     | 0.5  | 0.25  | 0.125      |
| MCR-5.1-J53                                    | 8                                                                                                                                   | 0.5   | 0.5  | 0.25  | 0.094      |
| MCR-6.1-J53                                    | 8                                                                                                                                   | 0.5   | 0.5  | 0.25  | 0.094      |
| MCR-7.1-J53                                    | 8                                                                                                                                   | 0.5   | 0.5  | 0.125 | 0.094      |

\*AUR was ineffective towards all the tested strains.  $\text{MIC}_{\text{AUR}} = 40 \mu\text{g}\cdot\text{mL}^{-1}$  was used for the calculation of FICI.

**Supplementary Table 7 |** Related information of bacterial strains.

| Strain name                                 | Relevant Genotype/Phenotype                                                                                                   | Source/Reference |
|---------------------------------------------|-------------------------------------------------------------------------------------------------------------------------------|------------------|
| <i>E. coli</i> DH5a                         | Engineering strain                                                                                                            | In house         |
| <i>E. coli</i> BL21(DE3)                    | Engineering strain                                                                                                            | In house         |
| <i>E. coli</i> J53                          | Engineering strain                                                                                                            | In house         |
| <i>E. coli</i> CKE                          | Clinical isolate of <i>E. coli</i> CKE 1493;<br>MCR-1 <sup>+</sup> , NDM-5 <sup>+</sup> ; COL <sup>R</sup> ; MER <sup>R</sup> | In house         |
| NDM-HK                                      | Clinical isolate of <i>E. coli</i> NDM-HK;<br>NDM-1 <sup>+</sup> ; MER <sup>R</sup>                                           | In house         |
| NDM-BL21                                    | <i>E. coli</i> BL21(DE3)(pET-28a-NDM-1);<br>NDM-1 <sup>+</sup> ; MER <sup>R</sup>                                             | In house         |
| NDM-Rosetta                                 | Rosetta(DE3)(pET-28a-NDM-1);<br>NDM-1 <sup>+</sup> ; MER <sup>R</sup>                                                         | In house         |
| C208A-BL21                                  | <i>E. coli</i> BL21 (DE3)(pET-28a-NDM-1-C208A); NDM-1-C208A <sup>+</sup>                                                      | In house         |
| MCR-1-BL21                                  | <i>E. coli</i> BL21(DE3)(pET-28a-MCR-1);<br>MCR-1 <sup>+</sup> ; COL <sup>R</sup>                                             | This study       |
| MCR-1-S-BL21                                | <i>E. coli</i> BL21(DE3)(pET-15b-MCR-1-S);<br>MCR-1-S <sup>+</sup> ;                                                          | This study       |
| <i>E. coli</i> (VIM-2 <sup>+</sup> )        | <i>E. coli</i> BL21(DE3)(pET-28a-VIM-2);<br>VIM-2 <sup>+</sup> ; MER <sup>R</sup>                                             | In house         |
| <i>E. coli</i> (IMP-4 <sup>+</sup> )        | <i>E. coli</i> BL21(DE3)(pET-28a-IMP-4);<br>IMP-4 <sup>+</sup> ; MER <sup>R</sup>                                             | In house         |
| <i>E. coli</i> (CphA <sup>+</sup> )         | <i>E. coli</i> BL21(DE3)(pET-28a-CphA);<br>CphA <sup>+</sup> ; MER <sup>R</sup>                                               | This study       |
| <i>K. pneumoniae</i> (NDM-1 <sup>+</sup> )  | Clinical isolate of <i>Klebsiella pneumoniae</i> ; NDM-1 <sup>+</sup> ; MER <sup>R</sup>                                      | Patrick CY WOO   |
| MCR-1-J53                                   | <i>E. coli</i> J53 (pCR-XL-TOPO-MCR-1); MCR-1 <sup>+</sup> ; COL <sup>R</sup>                                                 | This study       |
| MCR-1.5-J53                                 | <i>E. coli</i> J53 (pET-28a-MCR-1.5);<br>MCR-1.5 <sup>+</sup> ; COL <sup>R</sup>                                              | This study       |
| MCR-1.6-J53                                 | <i>E. coli</i> J53 (pET-28a-MCR-1.6); MCR-1.6 <sup>+</sup> ; COL <sup>R</sup>                                                 | This study       |
| MCR-1.7-J53                                 | <i>E. coli</i> J53 (pET-28a-MCR-1.7);<br>MCR-1.7 <sup>+</sup> ; COL <sup>R</sup>                                              | This study       |
| MCR-1.9-J53                                 | <i>E. coli</i> J53 (pET-28a-MCR-1.9);<br>MCR-1.9 <sup>+</sup> ; COL <sup>R</sup>                                              | This study       |
| MCR-1.10-J53                                | <i>E. coli</i> J53 (pET-28a-MCR-1.10);<br>MCR-1.10 <sup>+</sup> ; COL <sup>R</sup>                                            | This study       |
| MCR-2.1-J53                                 | <i>E. coli</i> J53 (pET-28a-MCR-2.1);<br>MCR-2.1 <sup>+</sup> ; COL <sup>R</sup>                                              | This study       |
| MCR-3.1-J53                                 | <i>E. coli</i> J53 (pET-28a-MCR-3.1);<br>MCR-3.1 <sup>+</sup> ; COL <sup>R</sup>                                              | This study       |
| MCR-4.1-J53                                 | <i>E. coli</i> J53 (pET-28a-MCR-4.1);<br>MCR-4.1 <sup>+</sup> ; COL <sup>R</sup>                                              | This study       |
| MCR-5.1-J53                                 | <i>E. coli</i> J53 (pET-28a-MCR-5.1);<br>MCR-5.1 <sup>+</sup> ; COL <sup>R</sup>                                              | This study       |
| MCR-6.1-J53                                 | <i>E. coli</i> J53 (pET-28a-MCR-6.1);<br>MCR-6.1 <sup>+</sup> ; COL <sup>R</sup>                                              | This study       |
| MCR-7.1-J53                                 | <i>E. coli</i> J53 (pET-28a-MCR-7.1);<br>MCR-7.1 <sup>+</sup> ; COL <sup>R</sup>                                              | This study       |
| <i>S. flexneri</i> (MCR-1 <sup>-</sup> )    | Clinical isolate of <i>Shigella flexneri</i>                                                                                  | In house         |
| <i>S. flexneri</i> (MCR-1 <sup>+</sup> )    | Clinical isolate of <i>Shigella flexneri</i> CH27;<br>MCR-1 <sup>+</sup> ; COL <sup>R</sup>                                   | In house         |
| <i>S. typhimurium</i> (MCR-1 <sup>+</sup> ) | Clinical isolate of <i>Salmonella typhimurium</i> 0839; MCR-1 <sup>+</sup> ; COL <sup>R</sup>                                 | In house         |
| <i>K. pneumoniae</i> (MCR-1 <sup>+</sup> )  | Clinical isolate of <i>K. pneumoniae</i> 9607;<br>MCR-1 <sup>+</sup> ; COL <sup>R</sup>                                       | In house         |
| <i>E. asburiae</i> (MCR-1 <sup>+</sup> )    | Clinical isolate of <i>Enterobacter asburiae</i> 2658; MCR-1 <sup>+</sup> ; COL <sup>R</sup>                                  | In house         |
| <i>E. aerogenes</i> (MCR-1 <sup>+</sup> )   | Clinical isolate of <i>Enterobacter aerogenes</i> 7014; MCR-1 <sup>+</sup> ; COL <sup>R</sup>                                 | In house         |
| <i>E. kobei</i> (MCR-1 <sup>+</sup> )       | Clinical isolate of <i>Enterobacter kobei</i> 4113; MCR-1 <sup>+</sup> ; COL <sup>R</sup>                                     | In house         |

**Supplementary Table 8** | Summary of primer sequences (5'-3').

| Primer name         |                                                        |
|---------------------|--------------------------------------------------------|
| MCR-1.1 F           | 5'- TCAGAGCTCATGATGCAGCATACTTCTG -3'                   |
| MCR-1.1 R           | 5'- TCAGGATCCTCAGCGGATGAATGCG -3'                      |
| MCR-1.5 F           | 5'- TCA <del>CCATGGGG</del> GATGATGCAGCATACTTCTG -3'   |
| MCR-1.5 R           | 5'- TCA <del>CTCGAG</del> TCAGCGGATGAATGCG -3'         |
| MCR-1.6 F           | 5'- TCA <del>CCATGGGG</del> GATGATGCAGCATACTTCTG -3'   |
| MCR-1.6 R           | 5'- TCA <del>CTCGAG</del> TCAGCGGATGAATGCG -3'         |
| MCR-1.7 F           | 5'- TCA <del>CCATGGGG</del> GATGATGCAGCATACTTCTG -3'   |
| MCR-1.7 R           | 5'- TCA <del>CTCGAG</del> TCAGCGGATGAATGCG -3'         |
| MCR-1.9 F           | 5'- TCA <del>CCATGGGG</del> GATGATGCAGCATACTTCTG -3'   |
| MCR-1.9 R           | 5'- TCA <del>CTCGAG</del> TCAGCGGATGAATGCG -3'         |
| MCR-1.10 F          | 5'- TCA <del>CCATGGGG</del> GATGATGCAGCATACTTCTG -3'   |
| MCR-1.10 R          | 5'- TCA <del>CTCGAG</del> TCAGCGGATGAATGCG -3'         |
| MCR-2.1 F           | 5'- TCA <del>CCATGGGG</del> GATGACATCACATCAC -3'       |
| MCR-2.1 R           | 5'- TCA <del>CTCGAG</del> TACTGGATAAATGCCG -3'         |
| MCR-3.1 F           | 5'- TCA <del>CCATGGGG</del> GATGCCTTCCCTTATAAAAAT -3'  |
| MCR-3.1 R           | 5'- TCA <del>CTCGAG</del> TATTGAACATTACGACATTG -3'     |
| MCR-4.1 F           | 5'- TCA <del>CCATGGGG</del> GATGATTTCTAGATTTAAG -3'    |
| MCR-4.1 R           | 5'- TCA <del>CTCGAG</del> TAATACCTGCAAGGTGC -3'        |
| MCR-5.1 F           | 5'- TCA <del>CCATGGGG</del> GATGCGGTTGTCTGCATTTATC -3' |
| MCR-5.1 R           | 5'- TCA <del>CTCGAG</del> TATTGTGGTTGTCCTTTTC -3'      |
| MCR-6.1 F           | 5'- TCA <del>CCATGGGG</del> GATGACACAGCATAGTCC -3'     |
| MCR-6.1 R           | 5'- TCA <del>GATCCT</del> CAGCGGATGAATGCG -3'          |
| MCR-7.1 F           | 5'- TCA <del>CCATGGGG</del> GATGCGCATCACGCTCGG-3'      |
| MCR-7.1 R           | 5'- TCA <del>CTCGAG</del> TACTGCACGGTGCGGC -3'         |
| MCR-1-full length F | 5'- TCA <del>CATATG</del> ATGCAGCATACTTCTGTGTG-3'      |
| MCR-1-full length R | 5'- TCA <del>GATCCT</del> CAGCGGATGAATGCGGTGCGGTC -3'  |
| pET15b mutation F   | 5'- GATATACCTTGGGCAGCAGCCATC-3'                        |
| pET15b mutation R   | 5'- CTGCCCAAGGTATATCTCCTTC-3'                          |

\*These primers involved in the experiment. The restriction endonucleases digesting sites and mutated nucleotides are highlighted in blue and red color, respectively. Nonsense refinements were performed on NcoI sites of *mcr-3*, *mcr-4*, *mcr-5* and *mcr-7* genes to avoid the digestion by corresponding enzyme.
