# Supplementary material for: Resensitizing carbapenem- and colistin-resistant bacteria to antibiotics using auranofin
Source: PubMed Central journal article supplement (PMC7568570; doi:10.1038/s41467-020-18939-y), 2020-10-16

# Full scan of western blot for panels of figures 1e; 3e

Unpublished data

Control\_NDM-1

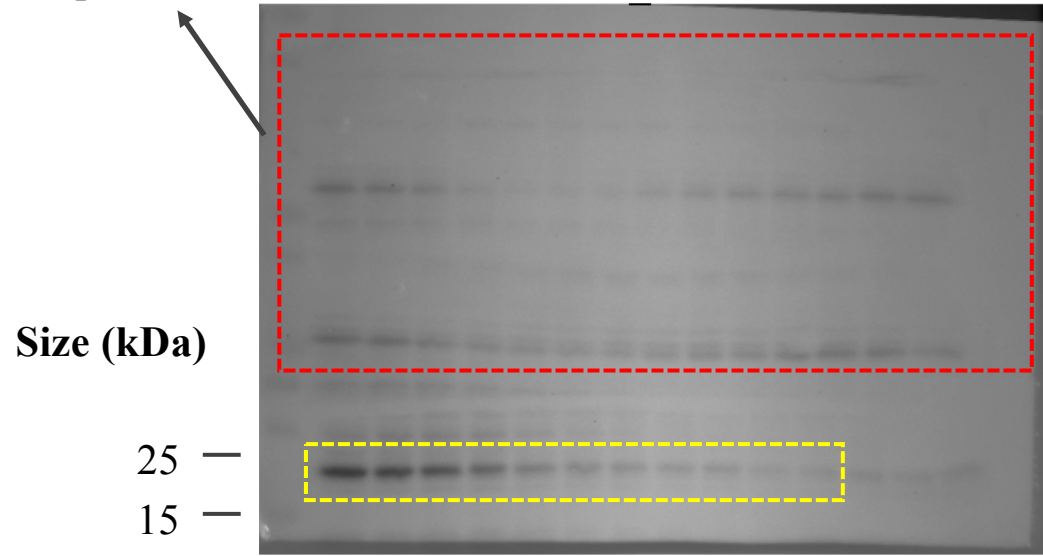

Size (kDa)

Control\_MCR-1

70 —  
55 —  
40 —  
35 —  
25 —

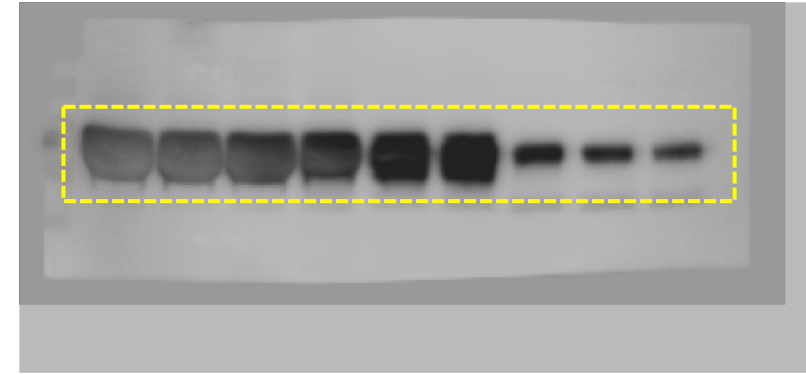

Size (kDa)

AUR treated\_NDM-1

40 —  
35 —  
25 —  
15 —

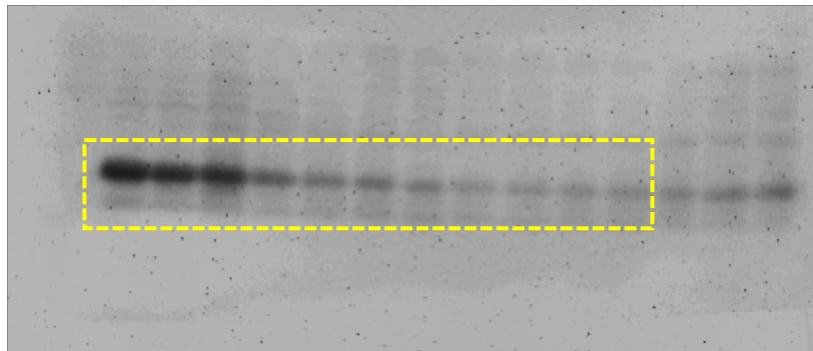

Size (kDa)

AUR treated\_MCR-1

55 —  
40 —  
35 —  
25 —

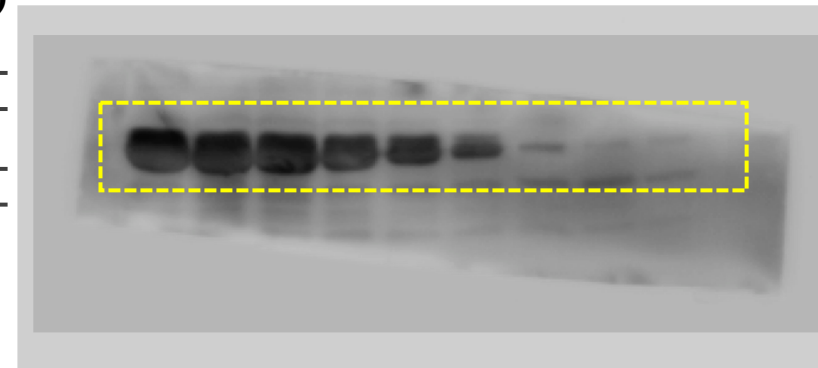

Supplement: 41467_2020_18939_MOESM5_ESM.pdf [file 41467_2020_18939_MOESM5_ESM.pdf]
